# Supplementary material for: Where Should I Send It? Optimizing the Submission Decision Process
Source: PLOS journal article supplement (doi:10.1371/journal.pone.0115451), 2015-01-23

## Figure S4

Expected number of citations for a given number of submissions for 3,200,000 different journal ranking combinations. Highlighted are the second-top journals for citation-maximizing strategies that minimize re-submissions (i.e., the journals that follow those in Figure 3).

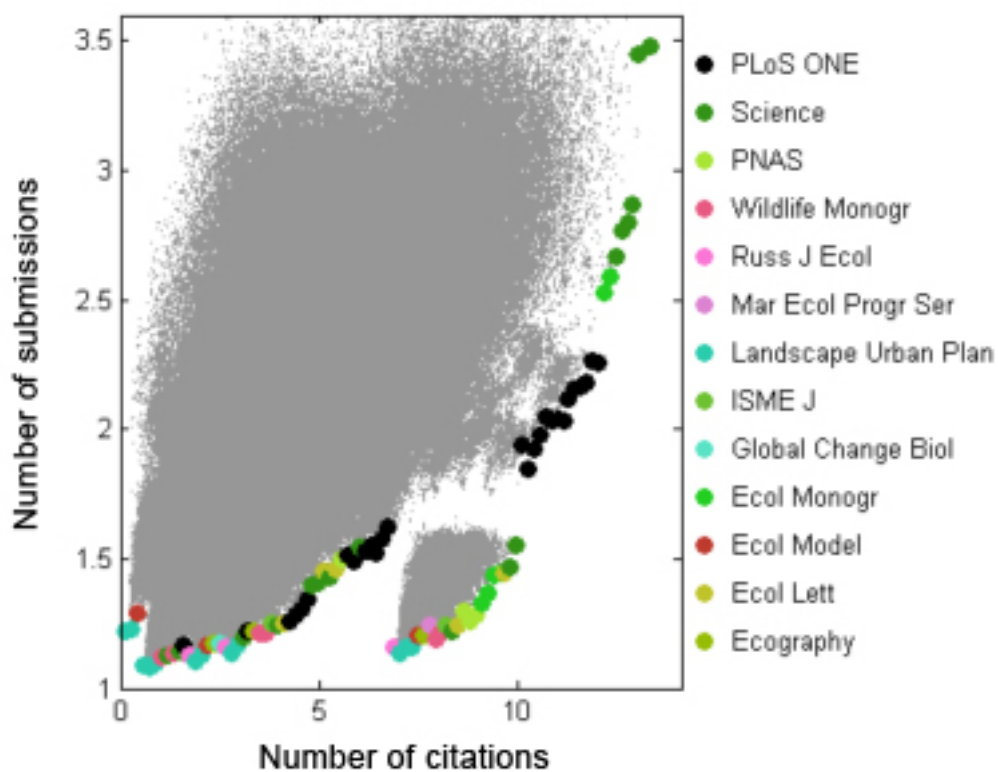

Supplement: S4 (10.1371/journal.pone.0115451.s004) [file journal.pone.0115451.s004]
